# Supplementary material
Source: PubMed Central journal article supplement (PMC6401250)
Supplement: NIHMS1519162-supplement-1.pdf [file NIHMS1519162-supplement-1.pdf]

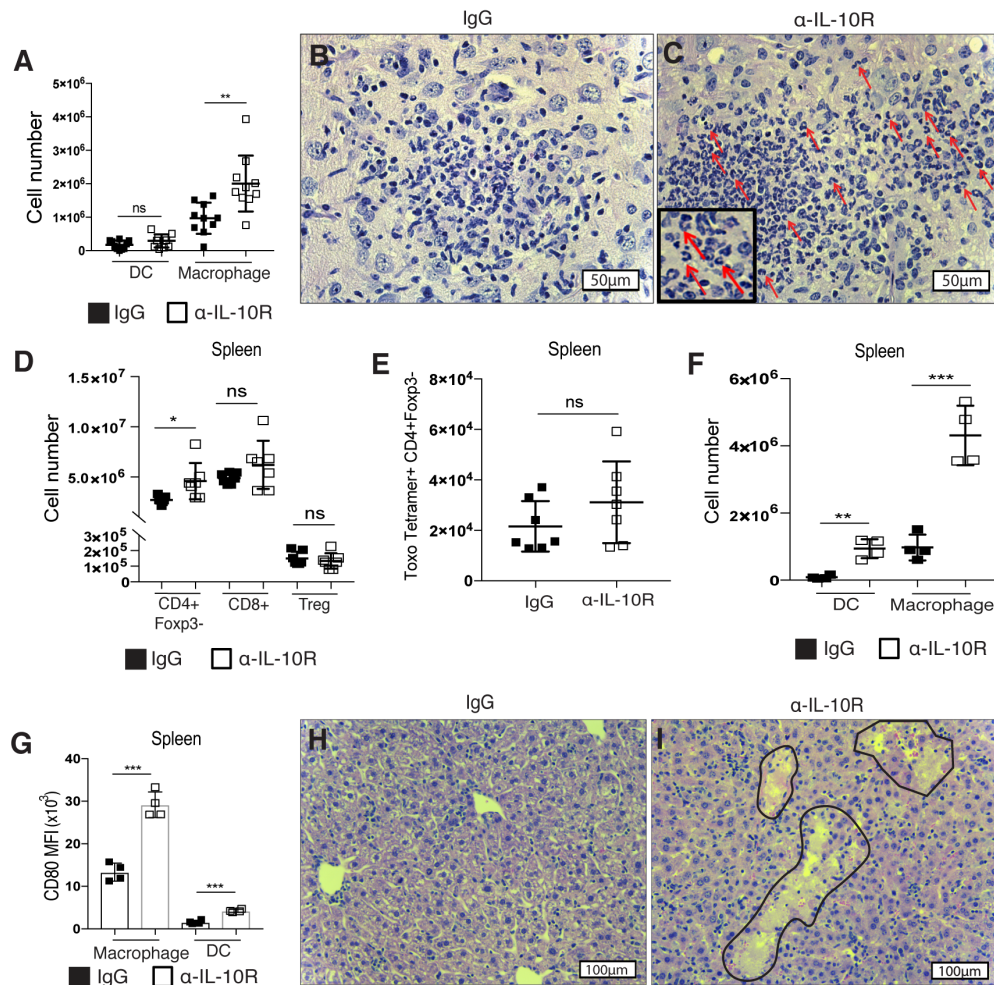

**Supplementary Figure 1. IL-10R blockade results in increased APC activation and immunopathology in the periphery along with increased numbers of infiltrating macrophages in the brain.** (A) Total number of infiltrating DCs and macrophages in the brains of chronically infected control and  $\alpha$ -IL-10R-treated mice analyzed by flow cytometry (n=5 per group, data is pooled from two independent experiments and analyzed by randomized block ANOVA). (B-C) Representative H&E stained brain sections from chronically infected control (B) and  $\alpha$ -IL-10R-treated (C) mice. Red arrows indicate the presence of neutrophils in the brain parenchyma. (D) Total T cell numbers in the spleens (n=3-4 per group, data is pooled from two independent experiments and analyzed using randomized block ANOVA) and (E) parasite tetramer+ CD4 T cells in the spleens of control and  $\alpha$ -IL-10R-treated mice (n=3-5 per group, data is pooled from two independent experiments and analyzed using randomized block ANOVA). (F) Total myeloid cell numbers in the spleens analyzed by flow cytometry (n=4 per group, data is representative of three independent experiments and analyzed using Student's t test) of control and  $\alpha$ -IL-10R-treated mice. (G) The MFI of CD80 on macrophages and DCs in the spleen (n=4 per group, data is representative of two independent experiments and analyzed using Student's t test). (H-I) Representative H&E stained sections of the livers of chronically infected control and  $\alpha$ -IL-10R-treated mice.  $\alpha$ -IL-10R-treated mice show areas of necrosis (outlined in black) not seen in controls. \* denotes  $p < 0.05$ , \*\* denotes  $p < 0.01$ , and \*\*\* denotes  $p < 0.001$  for all panels.

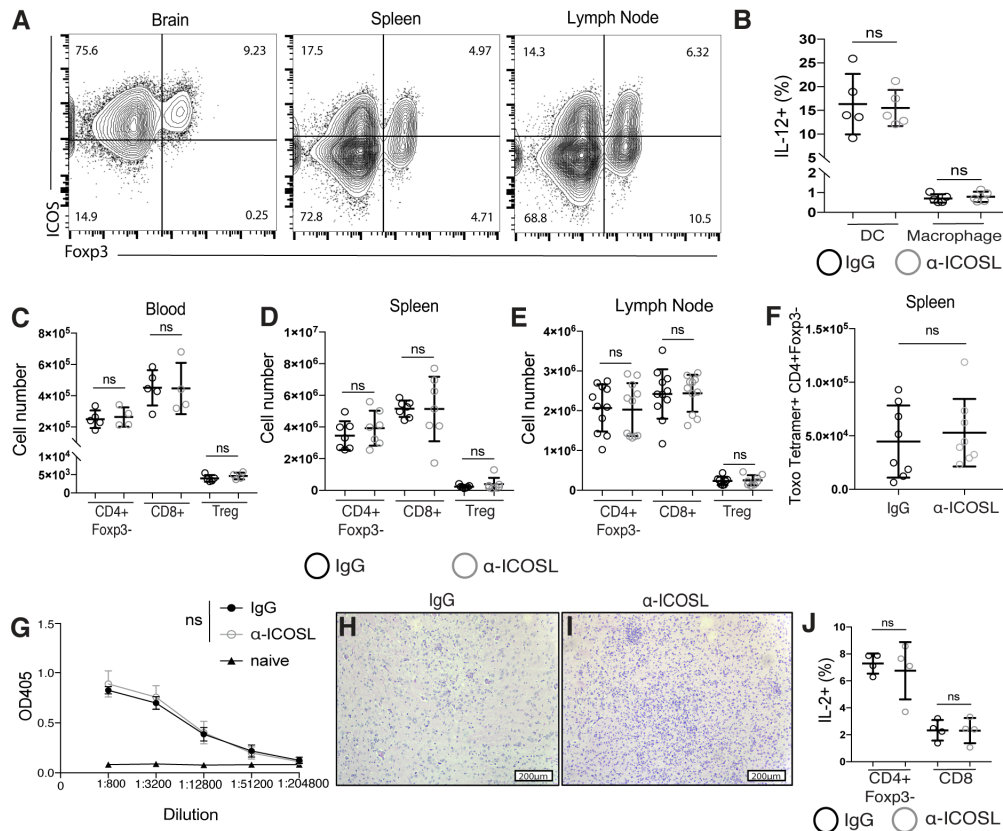

**Supplementary Figure 2. ICOSL blockade leads to increased numbers of DCs and IFN $\gamma$ -producing CD4<sup>+</sup> and CD8<sup>+</sup> T cells in the brain, with no changes in peripheral T cell responses.** (A) CD4 T cells were isolated from the brain, spleen, and cervical lymph nodes of chronically infected mice. Representative ICOS expression is shown on effector CD4 and regulatory T cells. Cells are pre-gated on CD3<sup>+</sup>CD4<sup>+</sup> live singlets. Plots are representative of three independent experiments of 2-4 mice. (B) The frequency of IL-12<sup>+</sup> DCs and infiltrating macrophages isolated from the brain and measured by flow cytometry following *ex vivo* incubation with BFA (n=5 per group, data is representative of 3 independent experiments and analyzed using Student's t test). (C-E) T cell numbers analyzed by flow cytometry after isolation from the blood (C) (n=4-5 per group, data is representative of two independent experiments and analyzed using Student's t test), spleen (D) (n=3-4 per group, data is pooled from two independent experiments and analyzed using randomized block ANOVA), and cervical lymph nodes (E) (n=3-4 per group, data is pooled from 3 independent experiments and analyzed using randomized block ANOVA) after  $\alpha$ -ICOSL blockade. (F) Parasite-specific CD4 effector T cells were stained for flow cytometry using an MHCII-peptide tetramer (n=4 per group, data is pooled from two independent experiments and analyzed using randomized block ANOVA). (G) Parasite-specific total IgG was measured by ELISA in the serum of chronically infected mice after  $\alpha$ -ICOSL blockade (n=4-5 mice per group, data is representative of two independent experiments and analyzed using two-way ANOVA). (H-I) Representative H&E stained brain sections from chronically infected mice following control or  $\alpha$ -ICOSL blockade. (J) IL-2 production was assessed following *ex vivo* restimulation of T cells isolated from the brains of control or  $\alpha$ -ICOSL treated mice. \* denotes p<0.05, \*\* denotes p<0.01, and \*\*\* denotes p<0.001 for all panels.

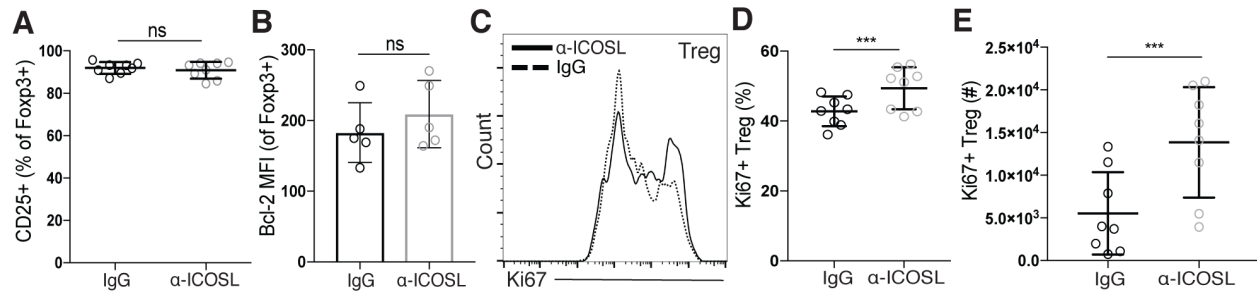

**Supplementary Figure 3. ICOSL blockade leads to more Ki67+ T<sub>regs</sub> in the brain independent of changes in T<sub>reg</sub> expression of CD25 or Bcl-2.** (A-E) T cells were isolated from the brains of chronically infected C57BL/6 mice following control or  $\alpha$ -ICOSL treatment and stained for flow cytometry. (A) Frequency of CD25+ T<sub>regs</sub> (n=4 per group, data is pooled from two independent experiments and analyzed using randomized block ANOVA) and (B) MFI of Bcl-2 in T<sub>regs</sub> from control and  $\alpha$ -ICOSL treated mice (n=5 per group, data is representative of five independent experiments and analyzed using Student's t-test). (C) Representative histogram showing Ki67 expression in T<sub>regs</sub> and (D) Frequency of Ki67+ T<sub>regs</sub> isolated from the brains of control and  $\alpha$ -ICOSL treated mice (n=3-5 per group, data is pooled from two independent experiments and analyzed using randomized block ANOVA). (E) Number of Ki67+ T<sub>regs</sub> in the brains of control and  $\alpha$ -ICOSL treated mice (n=3-5 per group, data is pooled from two independent experiments and analyzed using randomized block ANOVA). \* denotes p<0.05, \*\* denotes p<0.01, and \*\*\* denotes p<0.001 for all panels.
